# Supplementary material
Source: PubMed Central journal article supplement (PMC3923842)
Supplement: NIHMS544363-supplement-SUPPLEMENTAL_DATA_LEGENDS.pdf [file NIHMS544363-supplement-SUPPLEMENTAL_DATA_LEGENDS.pdf]

## SUPPLEMENTAL VIDEO LEGENDS

**Videos 1-4. LPA-stimulated morphological changes of transfected SYF+c-Src cells.** SYF+c-Src cells expressing YFP with CFP (video 1, YFP+CFP.mov), YFP with CFP-PTPL1 (video 2, YFP+CFP-PTPL1.mov), YFP-TRIP6 with CFP (video 3, YFP-TRIP6+CFP.mov), or YFP-TRIP6 with CFP-PTPL1 (video 4, YFP-TRIP6+CFP-PTPL1.mov) were plated on glass-bottomed 35-mm tissue culture dishes. Cells were washed with phenol red-free DMEM/F-12 containing 1% BSA and 10 mM HEPES, pH 7.4, and the expression of transfected proteins was first verified by fluorescence microscopy. Subsequently, cells were stimulated with 10  $\mu$ M LPA. The YFP images of live cells were acquired every 20 sec for 20 min using an inverted fluorescence microscope under the control of IPLab software. The images were animated at the speed of five frames/sec. Videos shown are representatives from five independent experiments.

## SUPPLEMENTAL FIGURES

**FIG. S1 Inhibition of PTP-BL expression does not affect the levels of total tyrosine phospho-proteins or tyrosine phosphorylation of c-Src-Y416 in SYF+c-Src MEFs.** SYF+c-Src MEFs transfected with pSUPER-siScramble or pSUPER-si(m)PTPL1 were treated with LPA or not as described in FIG. 1C. The total tyrosine phospho-proteins were immunoprecipitated with a control mouse IgG or an anti-phosphotyrosine antibody-conjugated agarose, and the immunoblot was probed with an HRP-conjugated anti-phosphotyrosine antibody. The expression of endogenous PTP-BL, phospho-c-Src-Y416 and total c-Src in the whole cell lysates was detected with their specific antibodies, respectively.
