# Supplementary material
Source: PubMed Central journal article supplement (PMC3923842)

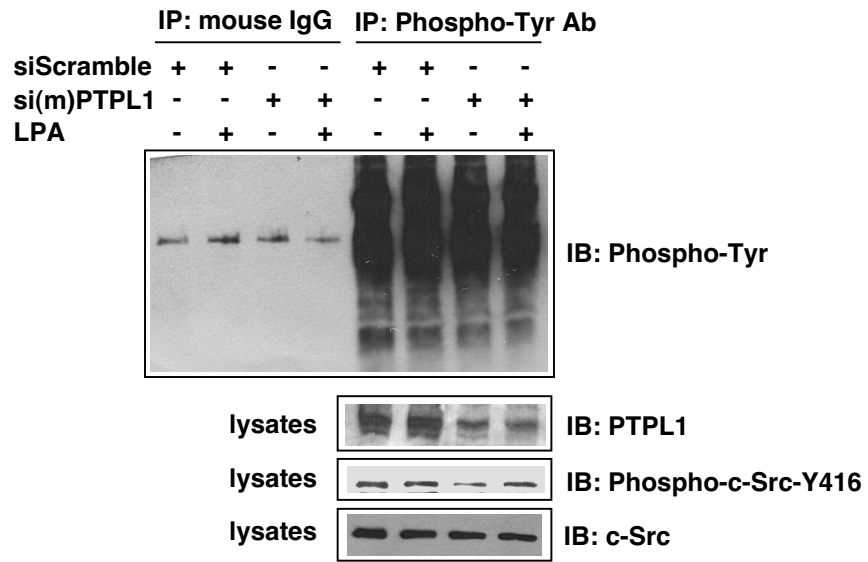

Supplement: NIHMS544363-supplement-FIG__S1.pdf [file NIHMS544363-supplement-FIG__S1.pdf]
